# Supplementary material for: P-block atom modified Sn(200) surface as a promising electrocatalyst for two-electron CO2 reduction: a first-principles study
Source: Royal Society of Chemistry journal article supplement (doi:10.1039/d2cp03740h), 2022-01-01
Supplement: d2cp03740h1.pdf [file d2cp03740h1.pdf]

### Supporting Information

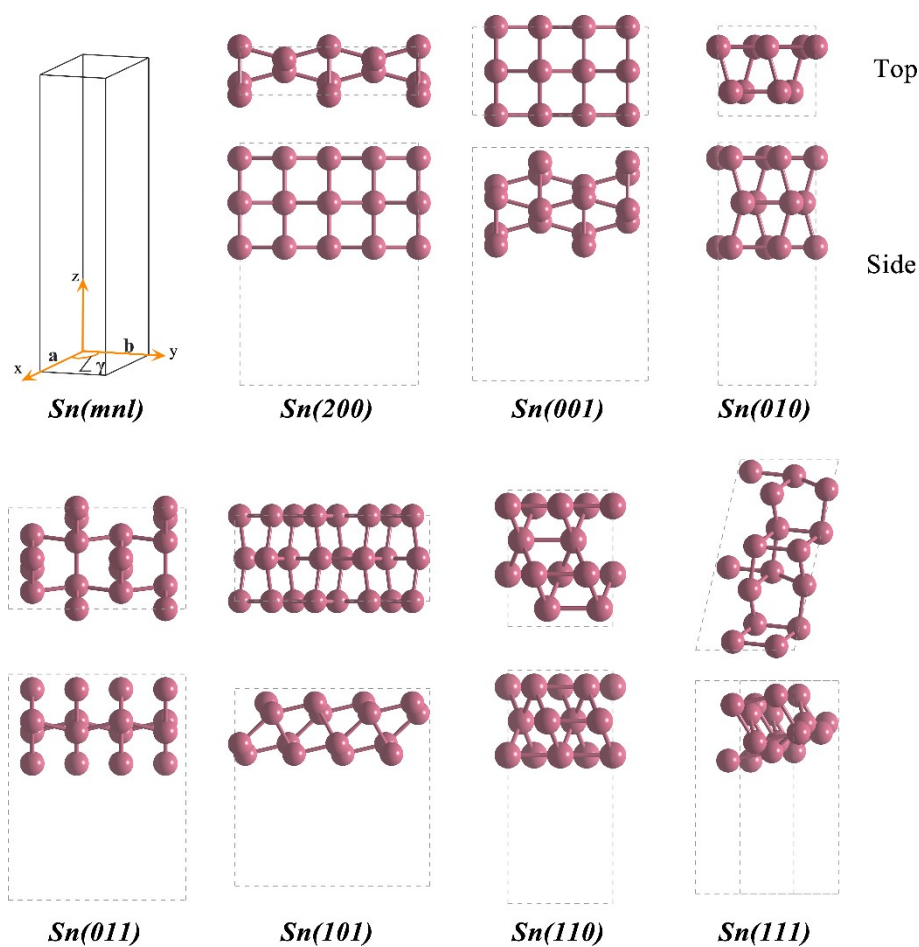

**SI-Figure 1.** The structure of Sn material in different low-index surfaces. The symbols  $m$ ,  $n$ , and  $l$  denote the index of the surface in  $x$ ,  $y$ , and  $z$  directions, respectively.

**SI-Table 1.** The surface energy ( $E_{sur}$ ), lattice constant ( $a$ ,  $b$ ), lattice angle ( $\gamma$ ), and surface area ( $S$ ) corresponding to Sn in various low-index surfaces. The symbols  $a$ ,  $b$ ,  $\gamma$ , and  $S$  can be found in **SI-Figure 1**.

| $Sn$ Surface | $E_{sur}$ (meV) | $a$ (Å) | $b$ (Å) | $\gamma$ (°) | $S$ (Å <sup>2</sup> ) |
|--------------|-----------------|---------|---------|--------------|-----------------------|
| (001)        | 45.75           | 5.84    | 5.84    | 90.00        | 34.13                 |
| (010)        | 40.28           | 3.17    | 5.84    | 90.00        | 18.53                 |
| (011)        | 36.90           | 5.84    | 6.65    | 90.00        | 38.83                 |
| (100)        | 37.88           | 5.84    | 3.17    | 90.00        | 18.53                 |
| (101)        | 36.86           | 6.65    | 5.84    | 90.00        | 38.83                 |
| (110)        | 47.54           | 3.17    | 8.26    | 90.00        | 26.21                 |
| (111)        | 41.22           | 6.65    | 6.65    | 76.80        | 43.03                 |
| (200)        | 36.50           | 5.84    | 3.18    | 90.00        | 18.58                 |

**SI-Table 2.** The change of Gibbs free energy ( $\Delta G$ ) at possible overpotentials during the  $\text{CO}_2$  reduction process.

| Product | Reaction process                                                                                                                    | $\Delta G$ (eV) associated overpotential |           |           |           |           |            |
|---------|-------------------------------------------------------------------------------------------------------------------------------------|------------------------------------------|-----------|-----------|-----------|-----------|------------|
|         |                                                                                                                                     | Sn(200)                                  | C-Sn(200) | N-Sn(200) | O-Sn(200) | S-Sn(200) | Se-Sn(200) |
| HCOOH   | $^*\text{CO}_{2(\text{ads})} + (\text{H}^+ + \text{e}^-) \rightarrow ^*\text{OCHO}_{(\text{ads})}$                                  |                                          | 0.02      |           |           |           | 0.05       |
|         | $^*\text{OCHO}_{(\text{ads})} + (\text{H}^+ + \text{e}^-) \rightarrow ^*\text{HCOOH}_{(\text{ads})}$                                | 0.73                                     |           | 0.66      | 0.59      | 0.36      | 0.26       |
|         | $^*\text{HCOOH}_{(\text{ads})} \rightarrow ^* + \text{HCOOH}_{(\text{g})}$                                                          |                                          | 0.19      |           |           |           |            |
|         | $^*\text{CO}_{2(\text{ads})} + (\text{H}^+ + \text{e}^-) \rightarrow ^*\text{COOH}_{(\text{ads})}$                                  | 0.58                                     | 0.28      |           | 0.72      | 0.88      | 0.68       |
| CO      | $^*\text{COOH}_{(\text{ads})} + (\text{H}^+ + \text{e}^-) \rightarrow ^*\text{CO}_{(\text{ads})} + \text{H}_2\text{O}_{(\text{g})}$ |                                          |           |           |           |           |            |
|         | $^*\text{CO}_{(\text{ads})} \rightarrow \text{CO}_{(\text{g})}$                                                                     |                                          | 0.29      | 1.62      |           |           |            |

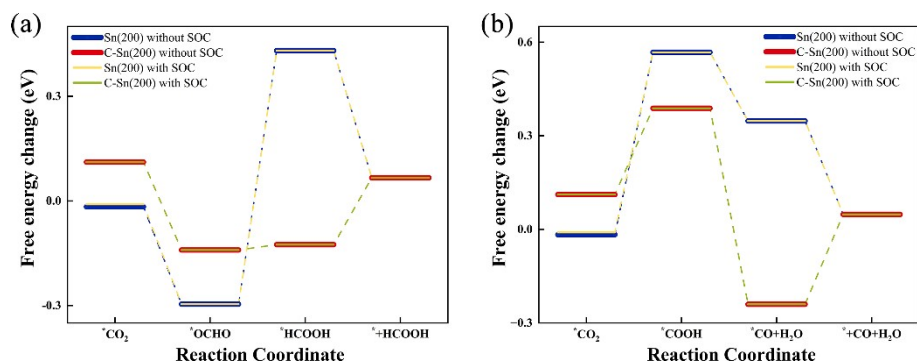

**SI-Figure 2.** The influence of spin-orbit coupling (SOC) on  $\text{CO}_2\text{RR}$  activity. The reduction of  $\text{CO}_2$  to HCOOH (a) and CO (b) at Sn(200) and C-Sn(200) surfaces.

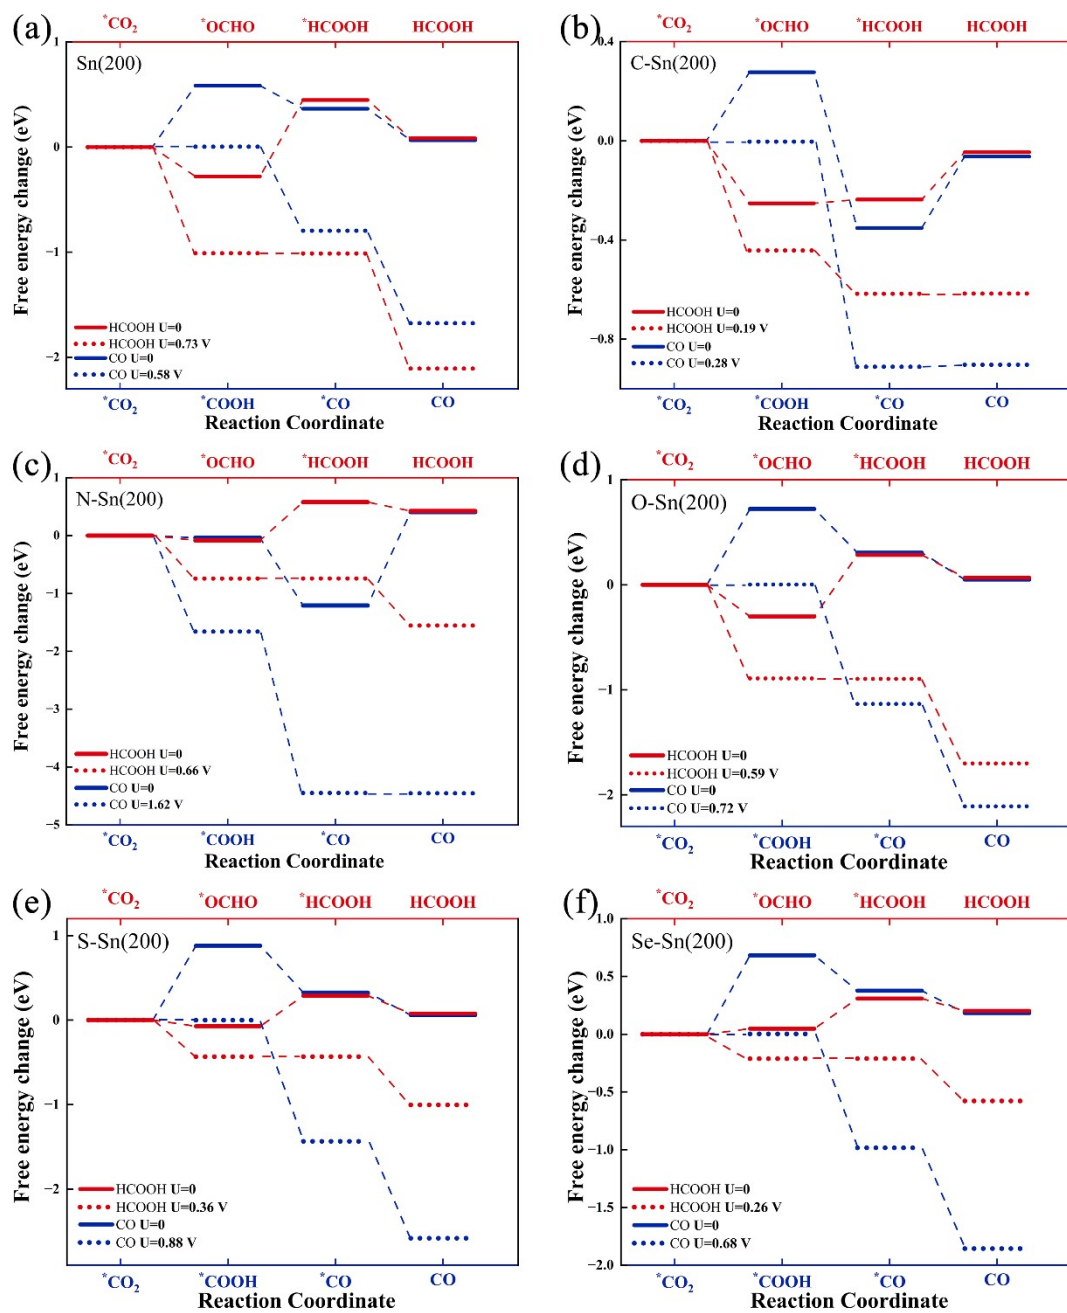

**SI-Figure 3.** The effect of electrode potential  $U$  on the two-electronic CO<sub>2</sub> reduction to form HCOOH and CO at different Sn(200) related substrates, as (a) Sn(200), (b) C-Sn(200), (c) N-Sn(200), (d) O-Sn(200), (e) S-Sn(200) and (f) Se-Sn(200). It should be mentioned that the reductions to form HCOOH and CO are denoted in red and dark blue lines, respectively.
